# Supplementary material
Source: Springer Nature journal article supplement (https://www.springermedizin.de/resource/supplementary/12955_2012_1110_MOESM2_ESM.pdf/9559314)

# FJS-12

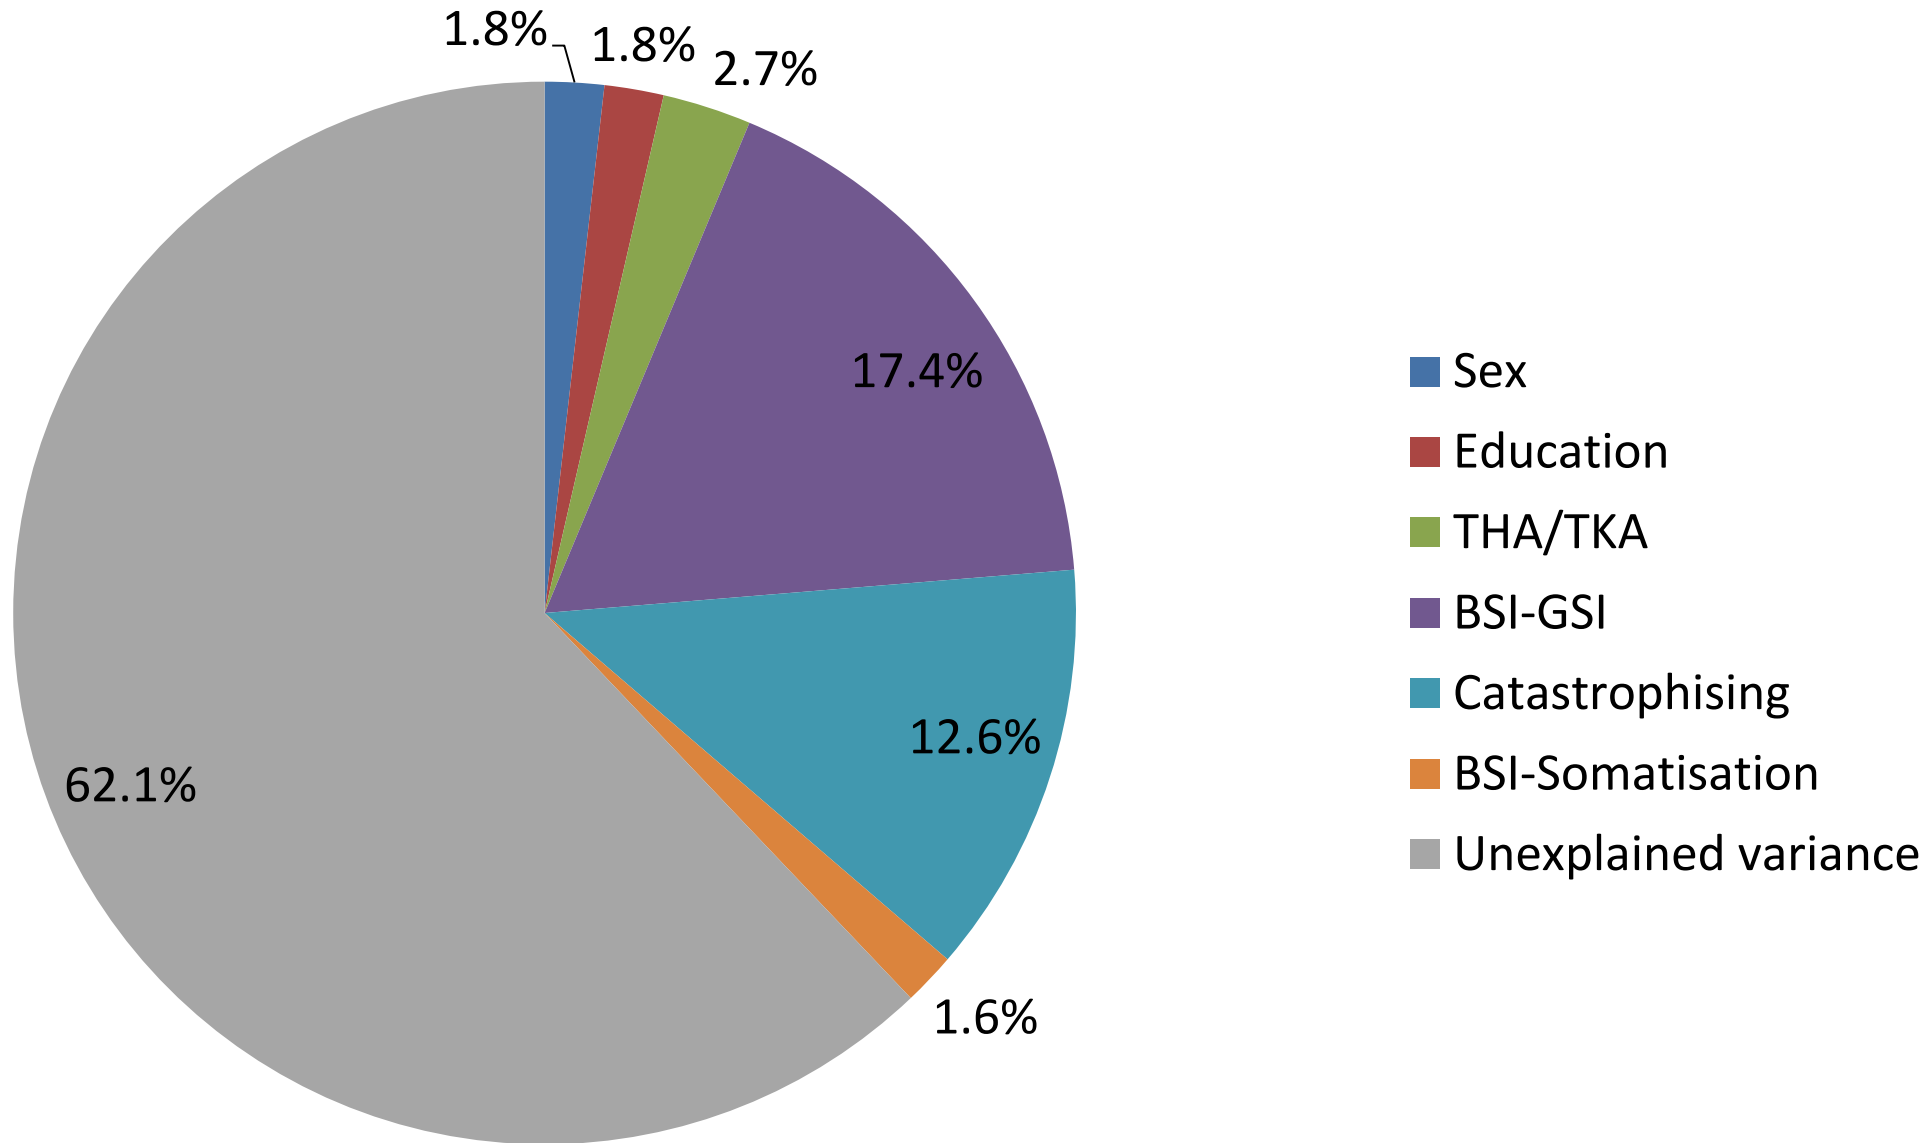

Supplement: MOESM2 [file 9559314]
